# Supplementary material for: Extent, regional variation and impact of gynecologist payment models in routine pelvic examinations: a nationwide cross-sectional study
Source: Springer Nature journal article supplement (doi:10.1186/s12905-017-0471-2), 2017-11-21

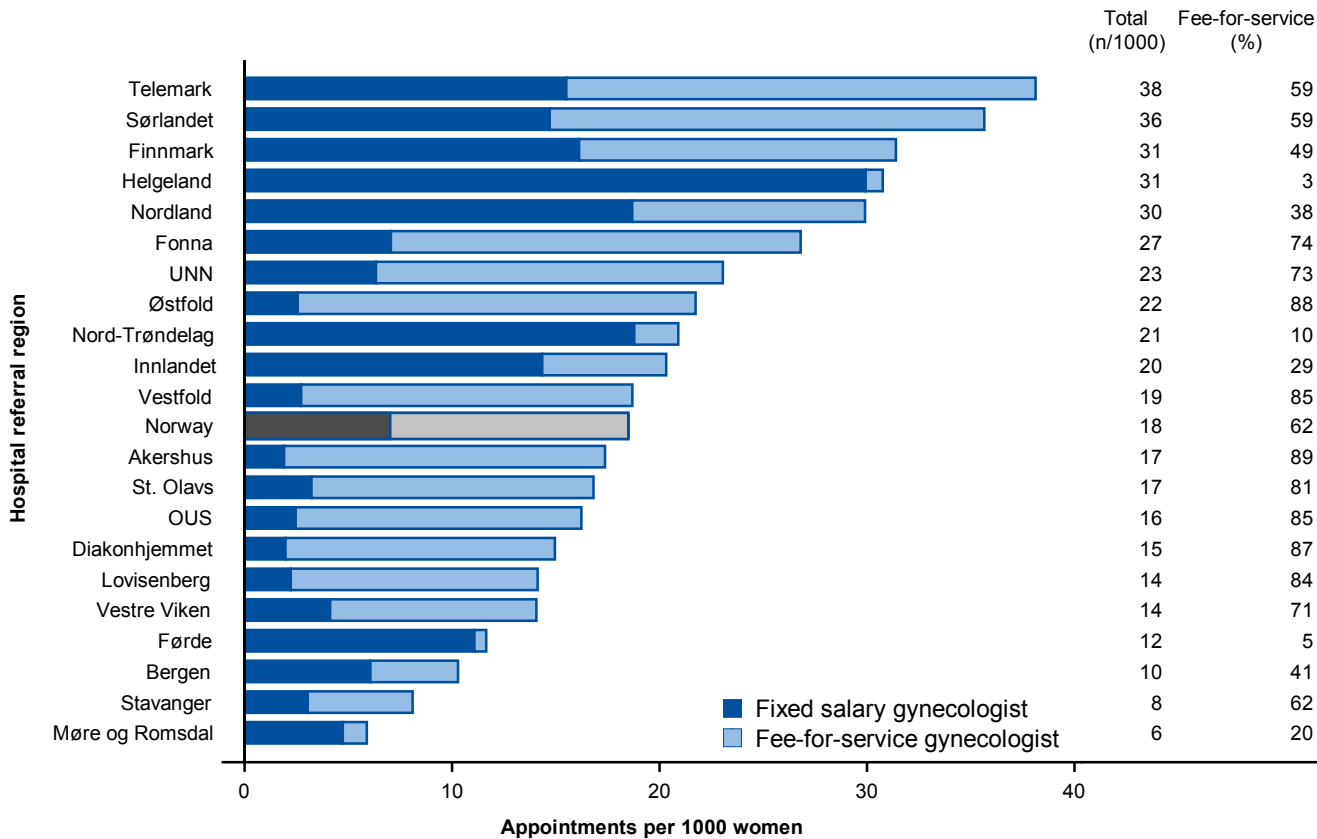

Supplement: MOESM2 [file 15240862]
